# Supplementary material for: The Resistance of Maize to Ustilago maydis Infection Is Correlated with the Degree of Methyl Esterification of Pectin in the Cell Wall
Source: MDPI journal article supplement (doi:10.3390/ijms241914737), 2023-09-29
Supplement: s1 [file s1]

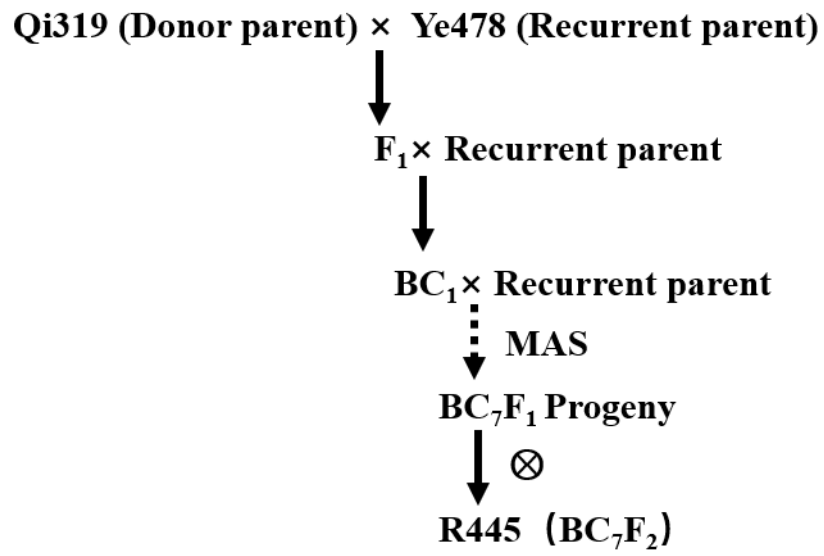

**Figure S1.** The diagrammatic representation of the genetic relationship between Ye478 and R445.

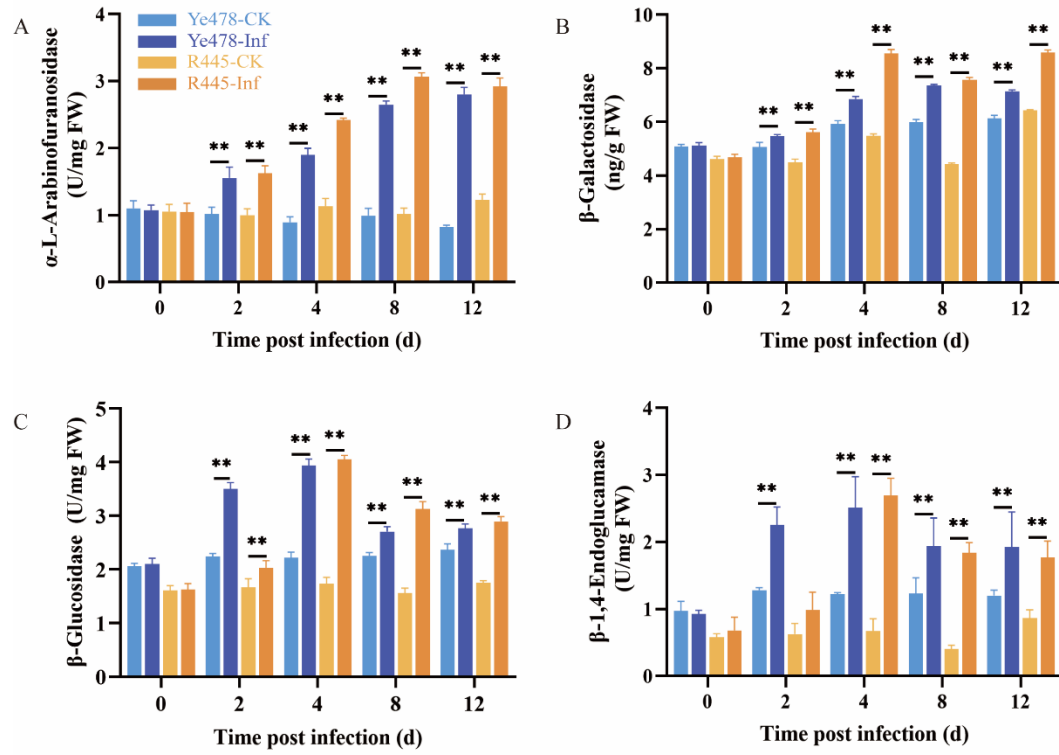

**Figure S2.** The changes in the contents of cell-wall-degrading enzymes (CWDEs) in the leaves infected by *U. maydis*. (A) α-L-arabinofuranosidase, (B) β-galactosidase, (C) β-glucosidase, and (D) β-1,4-glucanase contents were analyzed in maize leaves infected by *U. maydis*. Samples of Ye478 and R445 were collected at 0, 2, 4, 8, and 12 days postinfection (dpi). Ye478-CK/R445-CK: leaves infected with ddH<sub>2</sub>O; Ye478-Inf/ R445-inf: Ye478 leaves infected with *U. maydis*. Student's t test, \* and \*\* represent significant difference at  $P \leq 0.05$  and  $\leq 0.01$ , respectively.

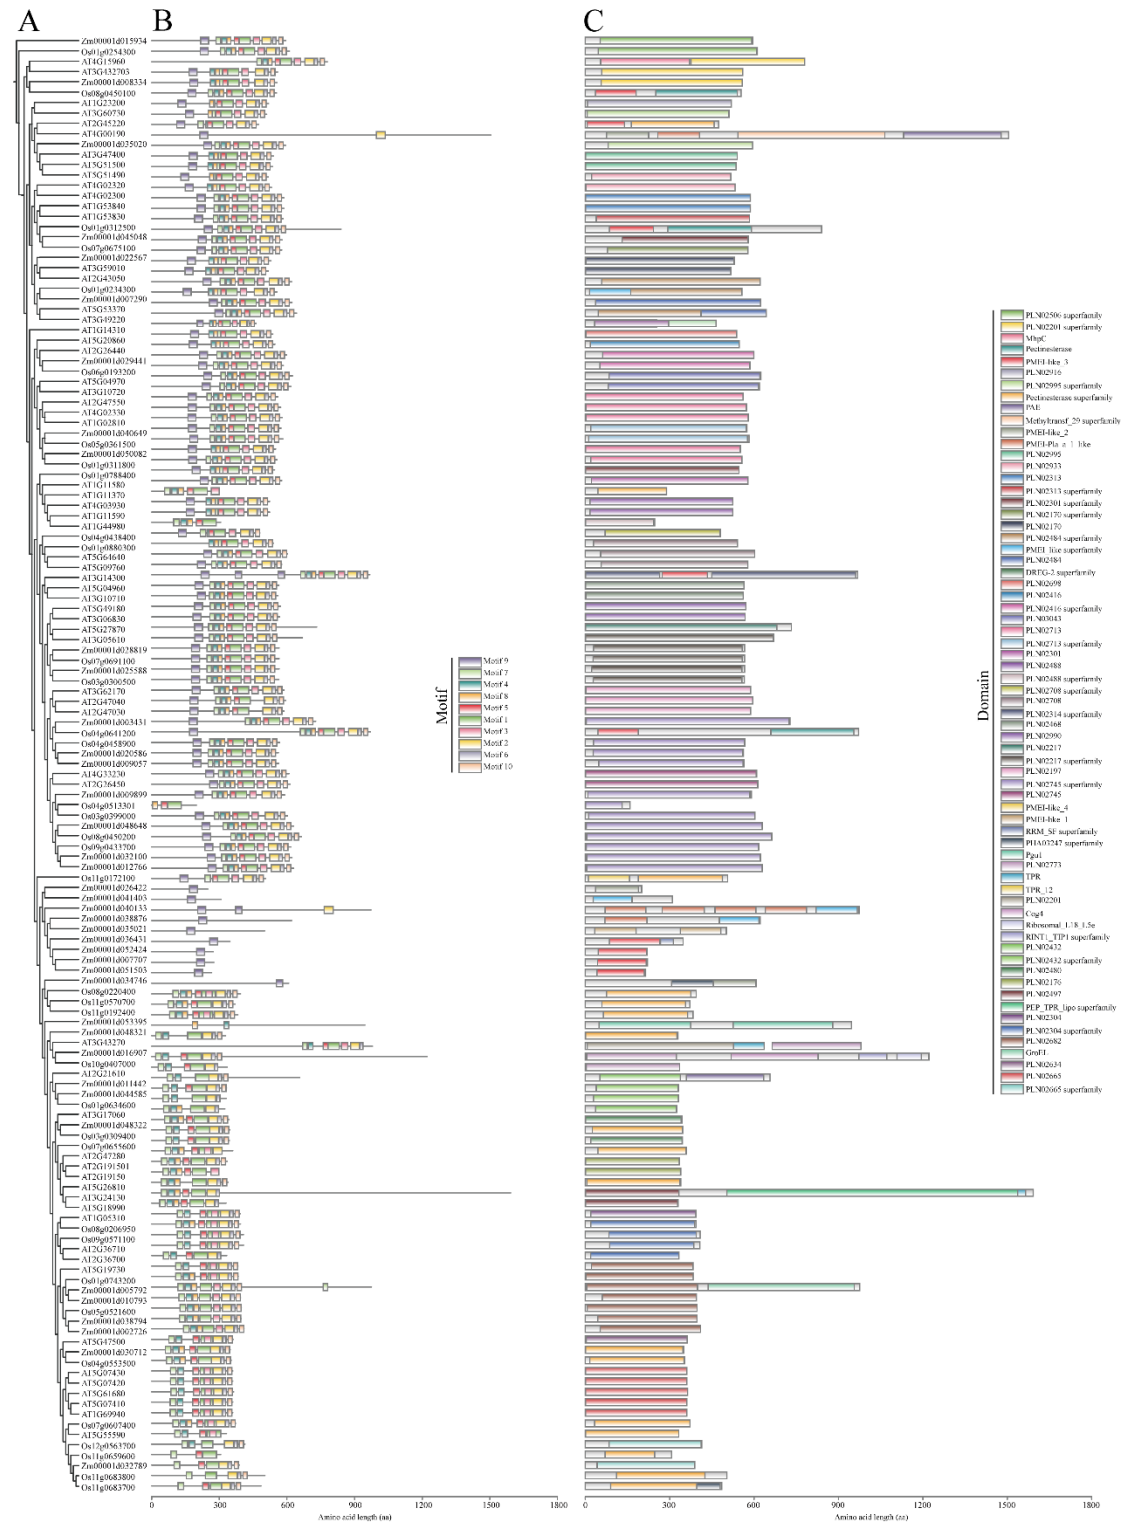

**Figure S3.** Phylogenetic relationships, conserved motifs, and domain structures of pectin methylesterase proteins in maize, rice, and *Arabidopsis*. (A) Phylogenetic tree of pectin methylesterase proteins in maize, rice, and *Arabidopsis*. (B) The composition and distribution of conserved motifs of pectin methylesterase proteins. (C) The composition and distribution of

domain structures of pectin methylesterase proteins.
