# Supplementary material for: The Resistance of Maize to Ustilago maydis Infection Is Correlated with the Degree of Methyl Esterification of Pectin in the Cell Wall
Source: MDPI journal article supplement (doi:10.3390/ijms241914737), 2023-09-29
Supplement: s1 [file s1]

**Table S3** Primer sequences and gene annotation for qRT-PCR.

| Gene ID        | Primer sequence (5'-3')   |                          | Gene annotation             | Gene origin                           |
|----------------|---------------------------|--------------------------|-----------------------------|---------------------------------------|
| Zm00001d009899 | F: TCAAACAAGCTCAGGGGCAA   | R: GAGCGTAAGGCCTGAGAAGG  | Pectin methylesterase17     | Transcriptome data (Zou et al., 2022) |
| Zm00001d009057 | F: GCTCTATGGTCAGTGCTGGA   | R: CATAGGCCCTCTTCCAGGT   | Polygalacturonase49         | Transcriptome data (Zou et al., 2022) |
| Zm00001d040649 | F: CTGGACGACCTTCAACTCCG   | R: GTAGAACGTCGAGAGGTCCG  | Pectin methylesterase16     | Transcriptome data (Zou et al., 2022) |
| Zm00001d051503 | F: CCCCgATGACACCTATCCC    | R: CATGTCATCAACATCGCGTCC | Pectinesterase inhibitor 12 | Common data base (NCBI)               |
| Zm00001d030712 | F: GGCgGCGTTCTATGACTGTA   | R: CCGAGGTAGAGTGCAAGTGG  | Putative pectinesterase 11  | Common data base (NCBI)               |
| Zm00001d010793 | F: ACATCACCTTCAAGCAGAACAC | R: GTAGCAGTCGCGGTAGTAGT  | Pectin methylesterase 38    | Common data base (NCBI)               |
| Zm00001d028819 | F: GCAATCGGGCAGGATACT     | R: TCATATCGACAACGCAGCCT  | Putative pectinesterase     | Common data base (NCBI)               |
| GAPDH          | F: CTTCGGCATTGTTGAGGGTTTG | R: TCCTTGGCTGAGGGTCCGTC  | <i>Zea mays GAPDH</i> gene  | -                                     |
| ppi            | F: AAAGAACACCGGACTTGG     | R: ACATCGTCAAGGCTATCG    | UMAG_03726                  | (Lin et al., 2021)                    |

Note: Transcriptome data derived from Zou et al. (2022) and common data base using NCBI (<https://www.ncbi.nlm.nih.gov/>); “-” no data.
