# Supplementary material for: The Resistance of Maize to Ustilago maydis Infection Is Correlated with the Degree of Methyl Esterification of Pectin in the Cell Wall
Source: MDPI journal article supplement (doi:10.3390/ijms241914737), 2023-09-29
Supplement: s1 [file s1]

**Table 2.** The information of 15 maize inbred lines.

| Number | Resistance level      | Name of the inbred line | Heterotic groups |
|--------|-----------------------|-------------------------|------------------|
| 1.     | susceptible           | Dong6002                | SPT              |
| 2.     |                       | HuangC                  | Reid             |
| 3.     |                       | KL4                     | Lan              |
| 4.     |                       | P007                    | PB               |
| 5.     |                       | 391                     | Mixed            |
| 6.     | partially susceptible | Xin444                  | SPT              |
| 7.     |                       | Dan598                  | LRC              |
| 8.     |                       | 1028                    | Mixed            |
| 9.     |                       | Longxi69                | LRC              |
| 10.    |                       | Cheng351                | Mixed            |
| 11.    | resistant             | 444                     | SPT              |
| 12.    |                       | K12                     | SPT              |
| 13.    |                       | Ji1037                  | Lan              |
| 14.    |                       | Dan6263                 | PB               |
| 15.    |                       | Sui601                  | Mixed            |
