# Supplementary material for: The Resistance of Maize to Ustilago maydis Infection Is Correlated with the Degree of Methyl Esterification of Pectin in the Cell Wall
Source: MDPI journal article supplement (doi:10.3390/ijms241914737), 2023-09-29
Supplement: s1 [file s1]

**Table S1.** The genetic information of single segment substitution line (SSSL) R445

| Primer  | Primer sequence (5'-3')     | Chromosomal location (bins) | Genetic location (cM) | Physical location (bp)  |
|---------|-----------------------------|-----------------------------|-----------------------|-------------------------|
| umc1528 | F: AGTTCAACTGCTTAAGATCCGGTG | 3.07                        | 544.4                 | 198,039,220 198,039,356 |
|         | R: GTCTGTCGTTGTGTGCCAGTG    |                             |                       |                         |
| umc1489 | F: TTAATAGCTACCCGCAACCAAGAA | 3.07                        | 567.7                 | 201,987,448 201,987,552 |
|         | R: CTGAGCCACAGTACCTTGCTGTT  |                             |                       |                         |
